# Supplementary material
Source: PubMed Central journal article supplement (PMC5709230)

# Emotion Mismatch > Identity Mismatch

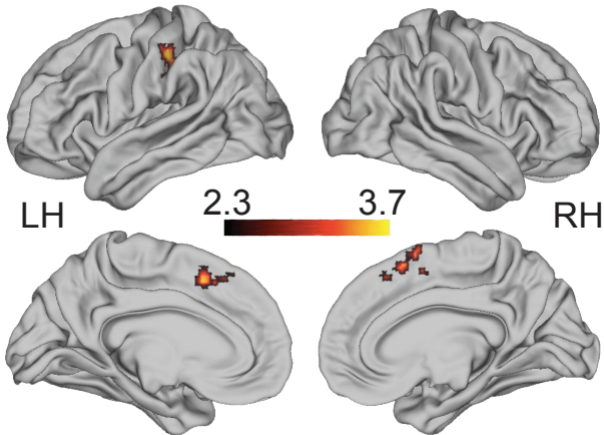

Supplement: NIHMS895760-supplement-Figure_1.pdf [file NIHMS895760-supplement-Figure_1.pdf]
